# Supplementary material for: Levofloxacin Cocrystal/Salt with Phthalimide and Caffeic Acid as Promising Solid-State Approach to Improve Antimicrobial Efficiency
Source: MDPI journal article supplement (doi:10.3390/antibiotics11060797), 2022-06-13
Supplement: s1 [file s1]

Supplementary File

# Levofloxacin Cocrystal/Salt with Phthalimide and Caffeic Acid as Promising Solid-State Approach to Improve Antimicrobial Efficiency

Noor Ul Islam <sup>1</sup>, Muhammad Naveed Umar <sup>1</sup>, Ezzat Khan <sup>1,2</sup>, Fakhria A. Al-Joufi <sup>3</sup>, Shaymaa Najm Abed <sup>4</sup>,  
Muhammad Said <sup>1</sup>, Habib Ullah <sup>5</sup>, Muhammad Iftikhar <sup>6</sup>, Muhammad Zahoor <sup>6,\*</sup> and Farhat Ali Khan <sup>7</sup>

<sup>1</sup> Department of Chemistry, University of Malakand, Chakdara, Dir Lower 18800, Khyber Pakhtunkhwa, Pakistan; nooruomchem@gmail.com (N.U.I.); m.naveedumar@uom.edu.pk (M.N.U.); ekhan@uom.edu.pk (E.K.); msaidqau@yahoo.com (M.S.)

<sup>2</sup> Department of Chemistry, College of Science, University of Bahrain, Sakhir 32038, Bahrain

<sup>3</sup> Department of Pharmacology, College of Pharmacy, Jouf University, Aljouf 72341, Saudi Arabia; faaljoufi@ju.edu.sa

<sup>4</sup> Nursing Department, College of Applied Medical Sciences, Jouf University, Sakaka 72311, Saudi Arabia; snabed@ju.edu.sa

<sup>5</sup> Department of Nuclear and Quantum Engineering, Korea Advanced Institute of Science and Technology (KAIST), Daejeon 34141, Korea; habibuom24@gmail.com

<sup>6</sup> Department of Biochemistry, University of Malakand, Chakdara, Dir Lower 18800, Khyber Pakhtunkhwa, Pakistan; miftikhar355@gmail.com

<sup>7</sup> Department of Pharmacy, Shaheed Benazir Bhutto University, Sheringal, Dir Upper 18000, Khyber Pakhtunkhwa, Pakistan; farhatkhan2k9@yahoo.com

\* Correspondence: mohammadzahoorus@yahoo.com

Construction of binary phase diagram

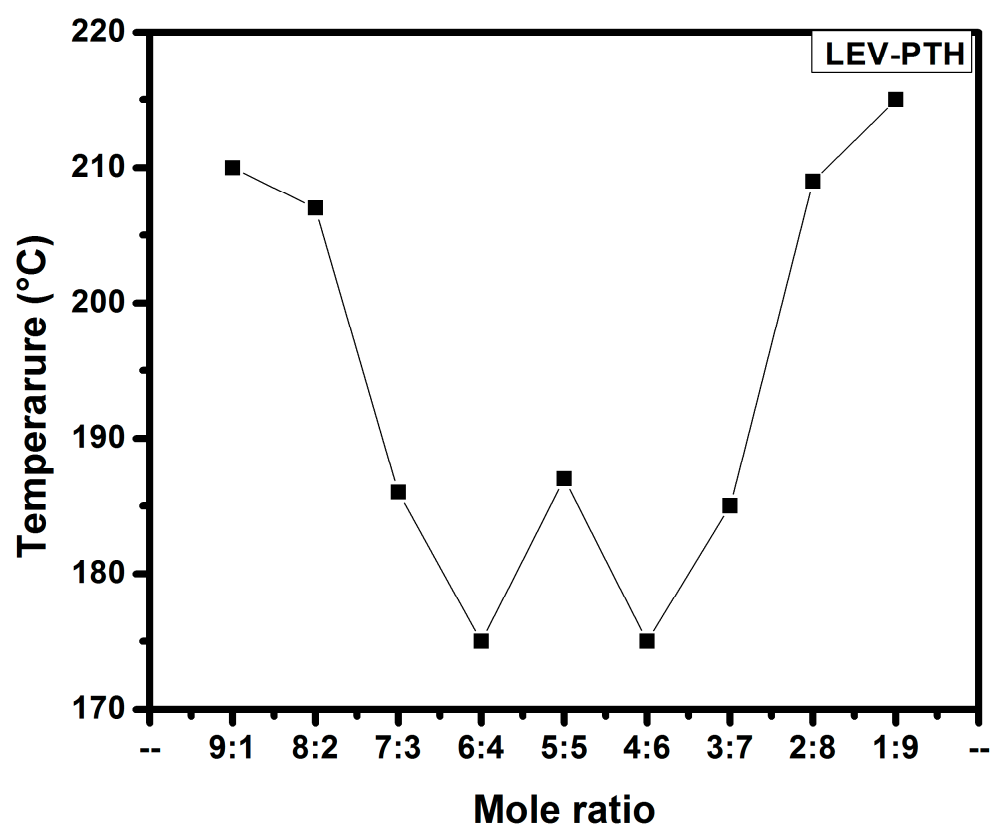

Figure S1. Binary phase diagram for LEV and CFA in different molar ratios.

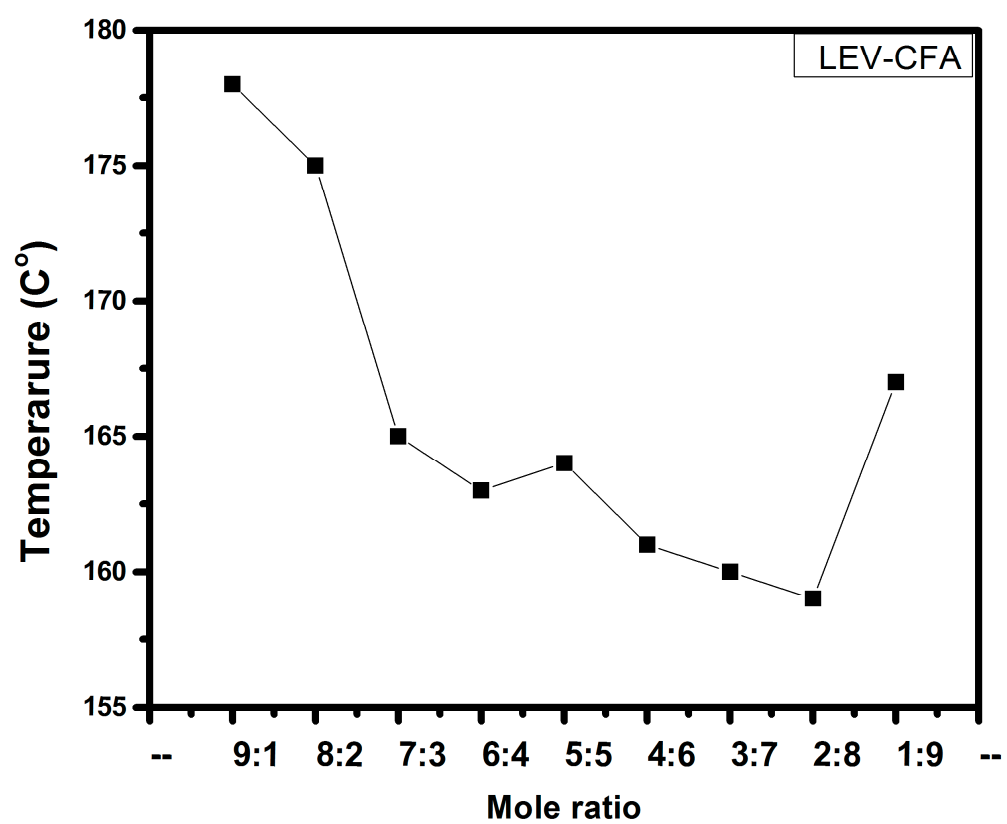

**Figure S2.** Binary phase diagram for LEV and CFA in different molar ratios.

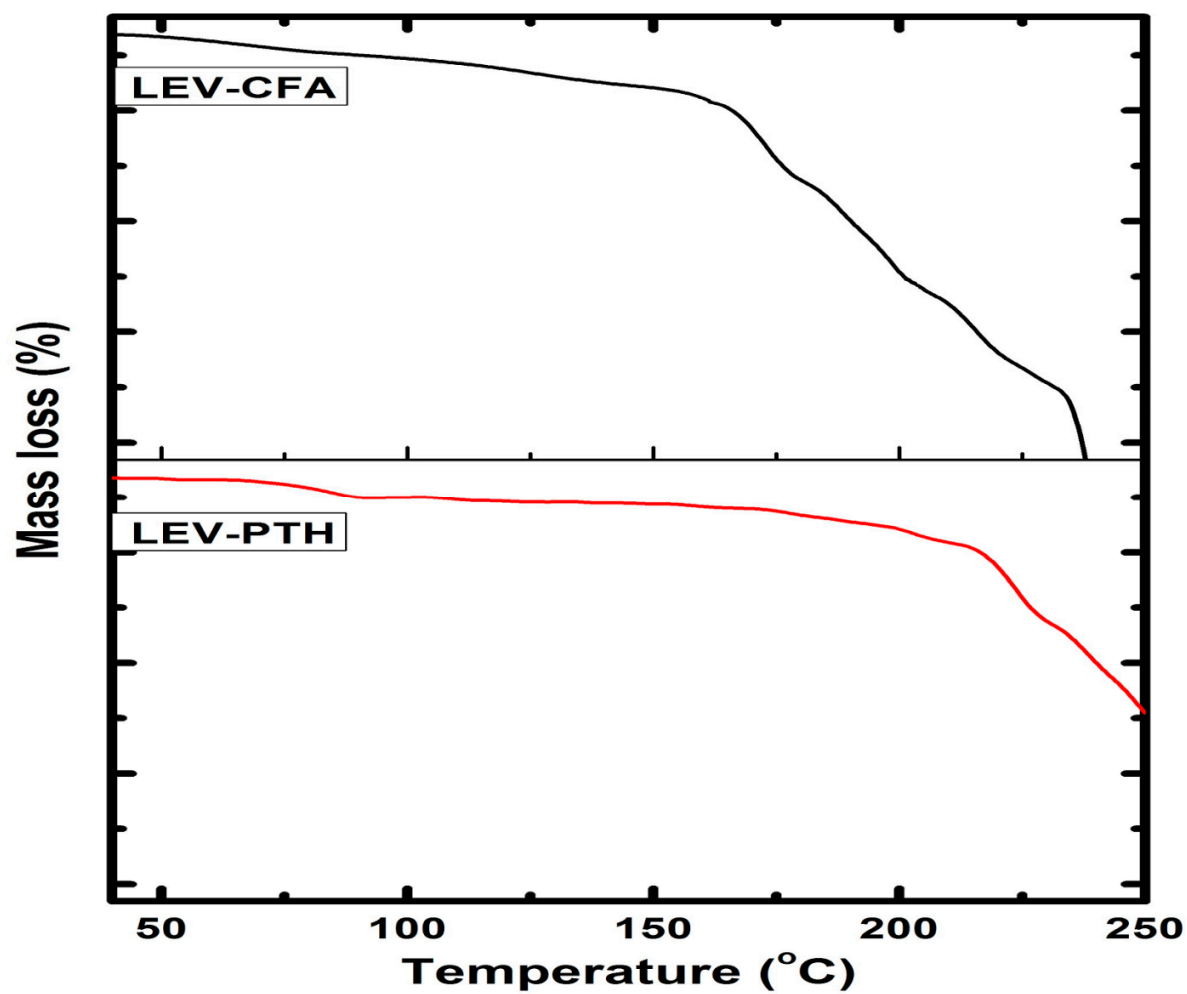

Figure S3. TG thermograms of cocrystal (LEV-PTH) and amorphous salt (LEV-CFA).

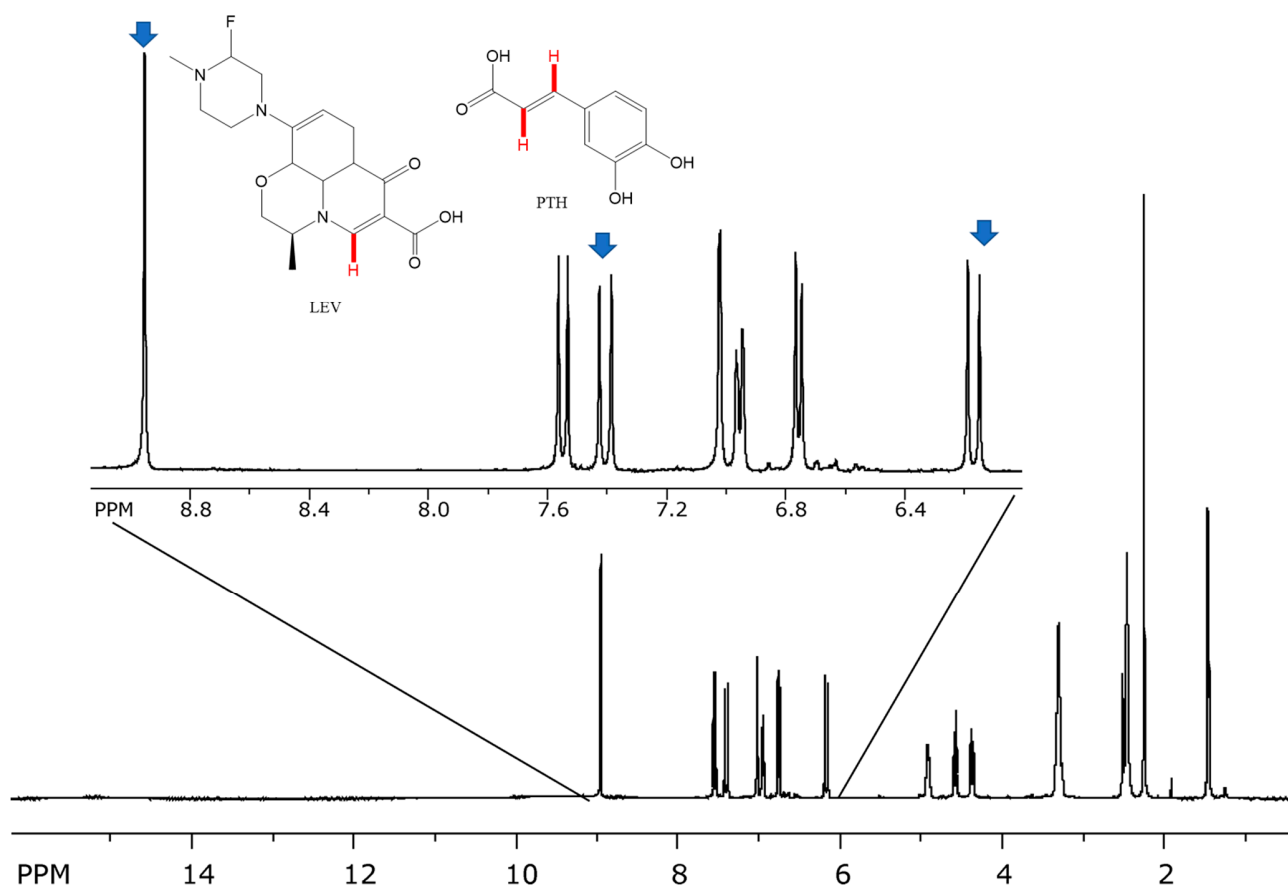

**Figure S4.**  $^1\text{H}$ -NMR (400 MHz, in  $\text{CDCl}_3$ ) spectra of LEV-PTH, integrated protons (red in individual Chemdraw structures) showing their presence in 1:1 ratio are marked by arrows. NMR Chemical Shift values (s ppm,  $^nJ(^1\text{H}, ^1\text{H})$  in Hz) = 15.18 br, 8.95 s, 7.56-7.53 d (12.3 Hz), 7.42 – 7.39 d (15.9 Hz), 7.02 s, 6.96 – 6.95 d (7.8 Hz), 6.76 – 6.74 d (8.0 Hz), 6.19-6.15 d (15.9 Hz), 4.91 q, 4.59 – 4.56 d (11.5 Hz), 4.38 – 4.35 d (11.5 Hz), 3.30 q, 2.45, 2.24, 1.45 d(6.7 Hz).

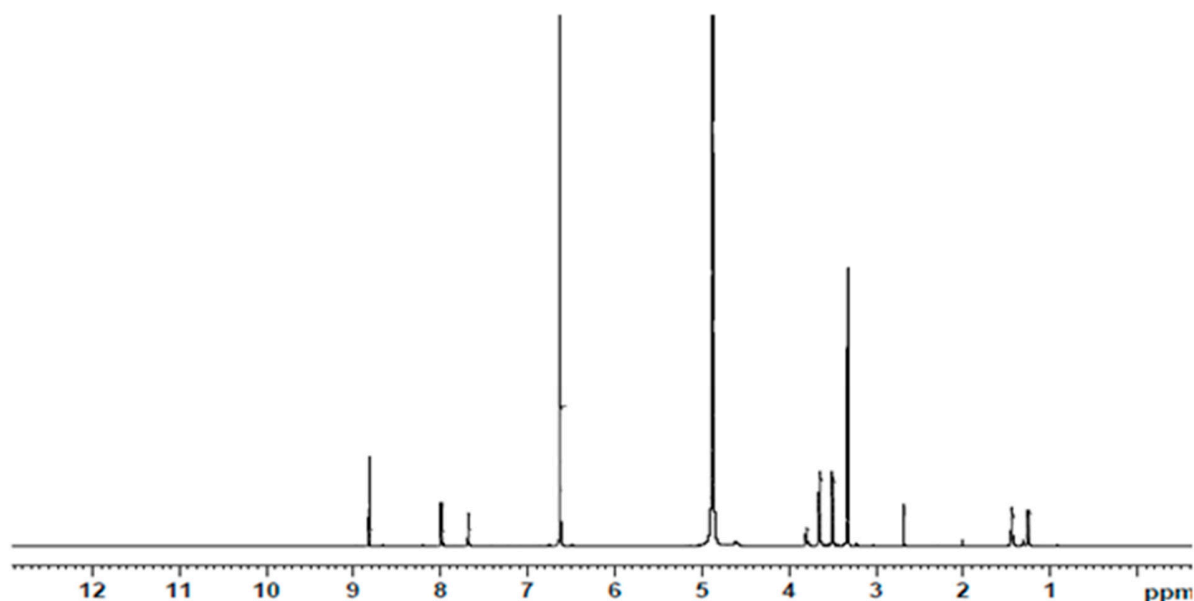

**Figure S5.**  $^1\text{H}$ -NMR (400 MHz) spectra of LEV-CFA. NMR Chemical Shift values (s ppm,  $^n/({}^1\text{H}, {}^1\text{H})$  in Hz) = 8.82 s, 8.00-7.98 d, 7.69, 4.88 s, 3.82, 3.79, 3.65, 3.50, 1.45, 1.45.

#### Micrometric study

Micrometric analysis of parental drug and prepared cocrystal/salt were performed and the obtained results were displayed in table S2.

#### Bulk density (BD)

Specific amount of powders LEV and cocrystal/salt were subjected in a measuring volume cylinder and noted bulk volume of each sample. Bulk density (BD) of cocrystal/salt and respective drug was calculated using the following formula:

$$\text{BD} = \frac{\text{mass of the sample}}{\text{bulk volume of the sample}}$$

#### Tapped density (TD)

After measuring bulk volume, the cylinder was tapped 100 times from height of 2 cm and volume of LEV, cocrystal and salt were calculated using the following formula:

$$\text{TD} = \frac{\text{mass of the sample}}{\text{tapped volume of the sample}}$$

#### Carr's index (compressibility index)

Compressibility parameter of LEV, cocrystal and salt were calculated as below:

$$\text{Compressibility index (CI)} = \frac{\text{TD} - \text{BD}}{\text{TD}} \times 100$$

#### Hausner's Ratio (HR)

The Hausner's ratio for the drug, cocrystal and salt were calculated using the formula:

$$\text{HR} = \text{TD}/\text{BD}$$

**Table S1.** Flow properties of LEV, cocrystal and salt.

| Flow property         | LEV  | Cocrystal<br>(LEV-PTH) | Salt<br>(LEV-CFA) |
|-----------------------|------|------------------------|-------------------|
| Bulk volume (mL)      | 1.2  |                        | 1.5               |
| Bulk density (g/mL)   | 0.83 |                        | 0.67              |
| Tapped volume (mL)    | 0.80 |                        | 1                 |
| Tapped density (g/mL) | 1.25 |                        | 1                 |
| Compressibility index | 33.6 |                        | 33                |
| Hausner's ratio       | 1.50 |                        | 1.49              |
